# Supplementary material for: Synthesis and biological evaluation of novel technetium-99m-labeled phenylquinoxaline derivatives as single photon emission computed tomography imaging probes targeting β-amyloid plaques in Alzheimer's disease
Source: Royal Society of Chemistry journal article supplement (doi:10.1039/c6ra28395k), 2017-01-01
Supplement: c6ra28395k1.pdf [file c6ra28395k1.pdf]

**SUPPLEMENTARY INFORMATION**

**Synthesis and Biological Evaluation of Novel Technetium-99m-Labeled  
Phenylquinoxaline Derivatives as Single Photon Emission Computed Tomography  
Imaging Probes Targeting  $\beta$ -Amyloid Plaques in Alzheimer's Disease.**

Shimpei Iikuni,<sup>†</sup> Masahiro Ono,<sup>\*,†</sup> Keiichi Tanimura,<sup>†</sup> Hiroyuki Watanabe,<sup>†</sup> Masashi  
Yoshimura,<sup>†</sup> Hideo Saji<sup>†</sup>

<sup>†</sup>Department of Patho-Functional Bioanalysis, Graduate School of Pharmaceutical  
Sciences, Kyoto University, 46-29 Yoshida Shimoadachi-cho, Sakyo-ku, Kyoto 606-  
8501, Japan.

\*To whom correspondence should be addressed: Phone: +81-75-753-4608, Fax: +81-  
75-753-4568, e-mail: ono@pharm.kyoto-u.ac.jp.

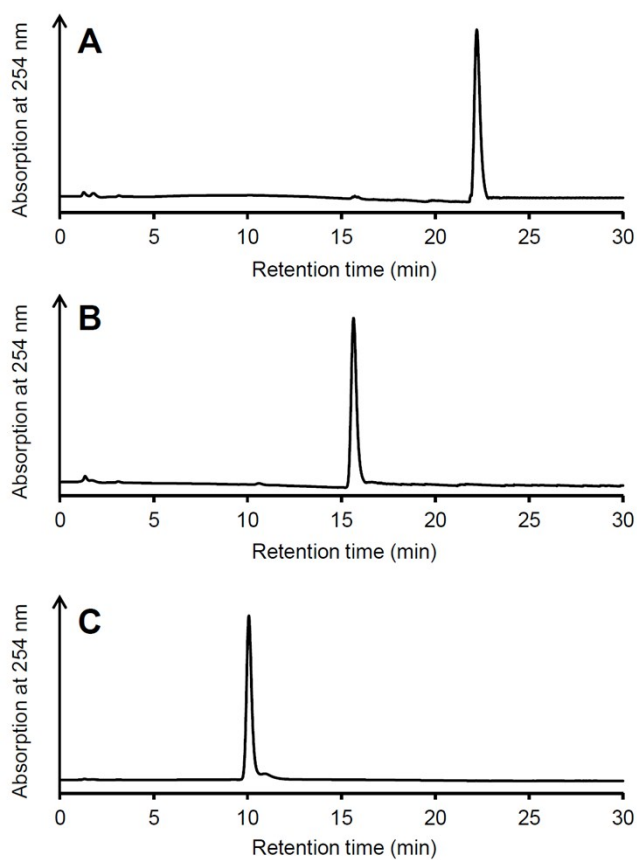

**Supplementary Figure S1.** Typical HPLC profiles of Re-BAT-C3-PQ-1 (A), Re-BAT-C3-PQ-2 (B), and Re-BAT-C3-PQ-3 (C). The analyses are performed on a Cosmosil C<sub>18</sub> column (5C<sub>18</sub>-AR-II, 4.6 × 150 mm) with a solvent of H<sub>2</sub>O/MeCN [11:9 (0 min) to 1:3 (30 min)] as the mobile phase at a flow rate of 1 mL/min.

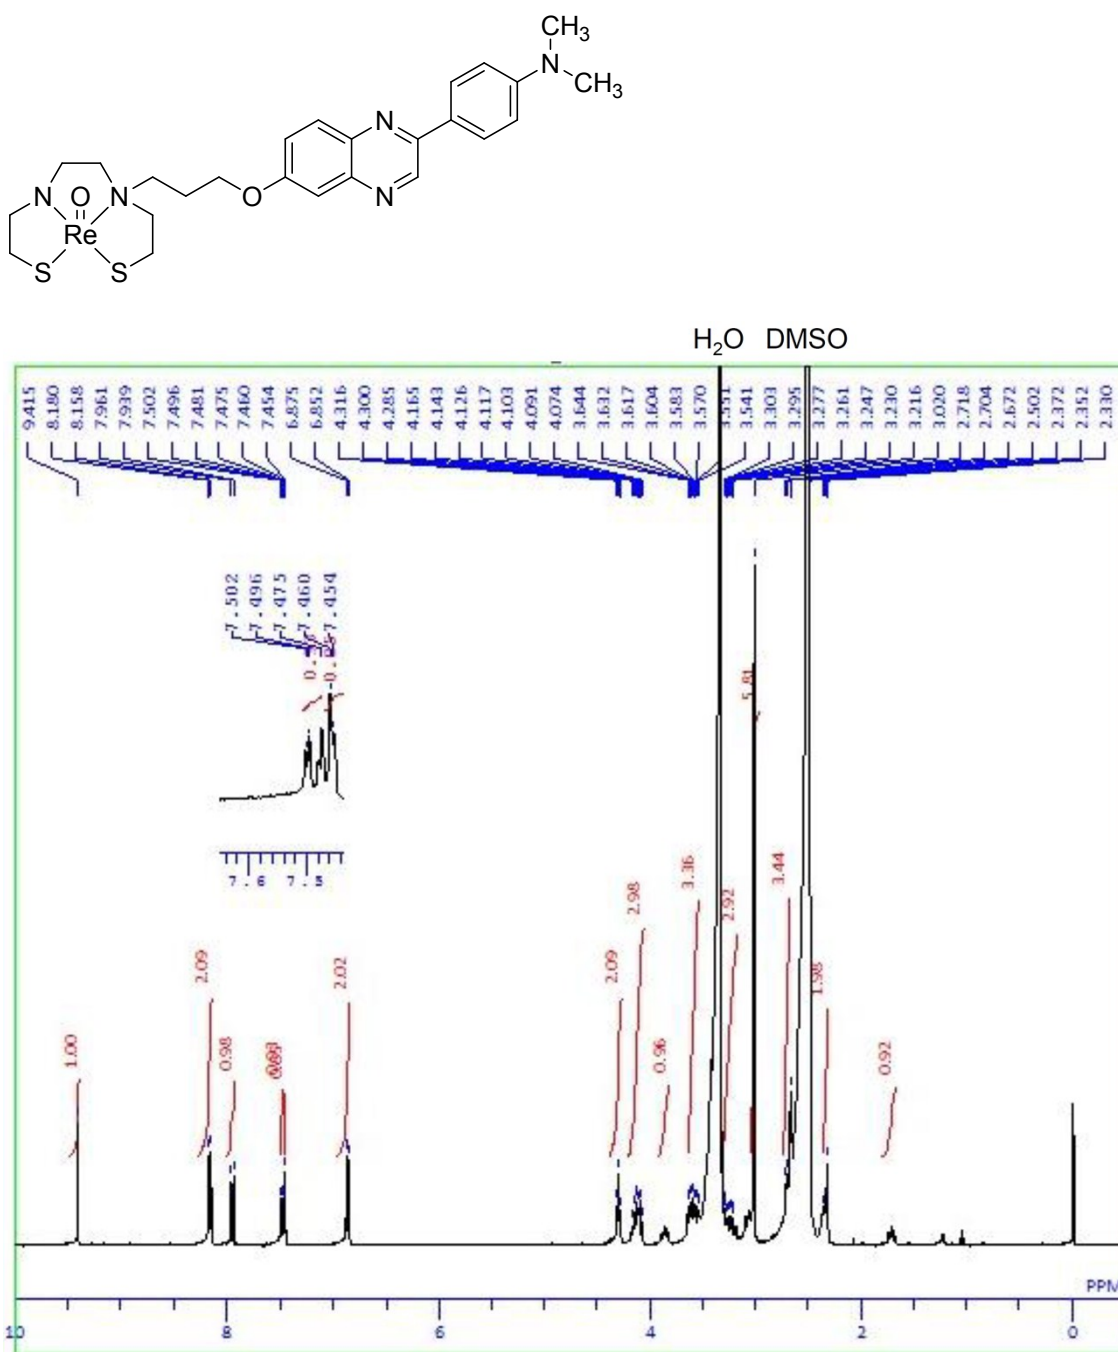

**Supplementary Figure S2.** Chemical structure and <sup>1</sup>H NMR spectra for compound 9

(Re-BAT-C3-PQ-1).

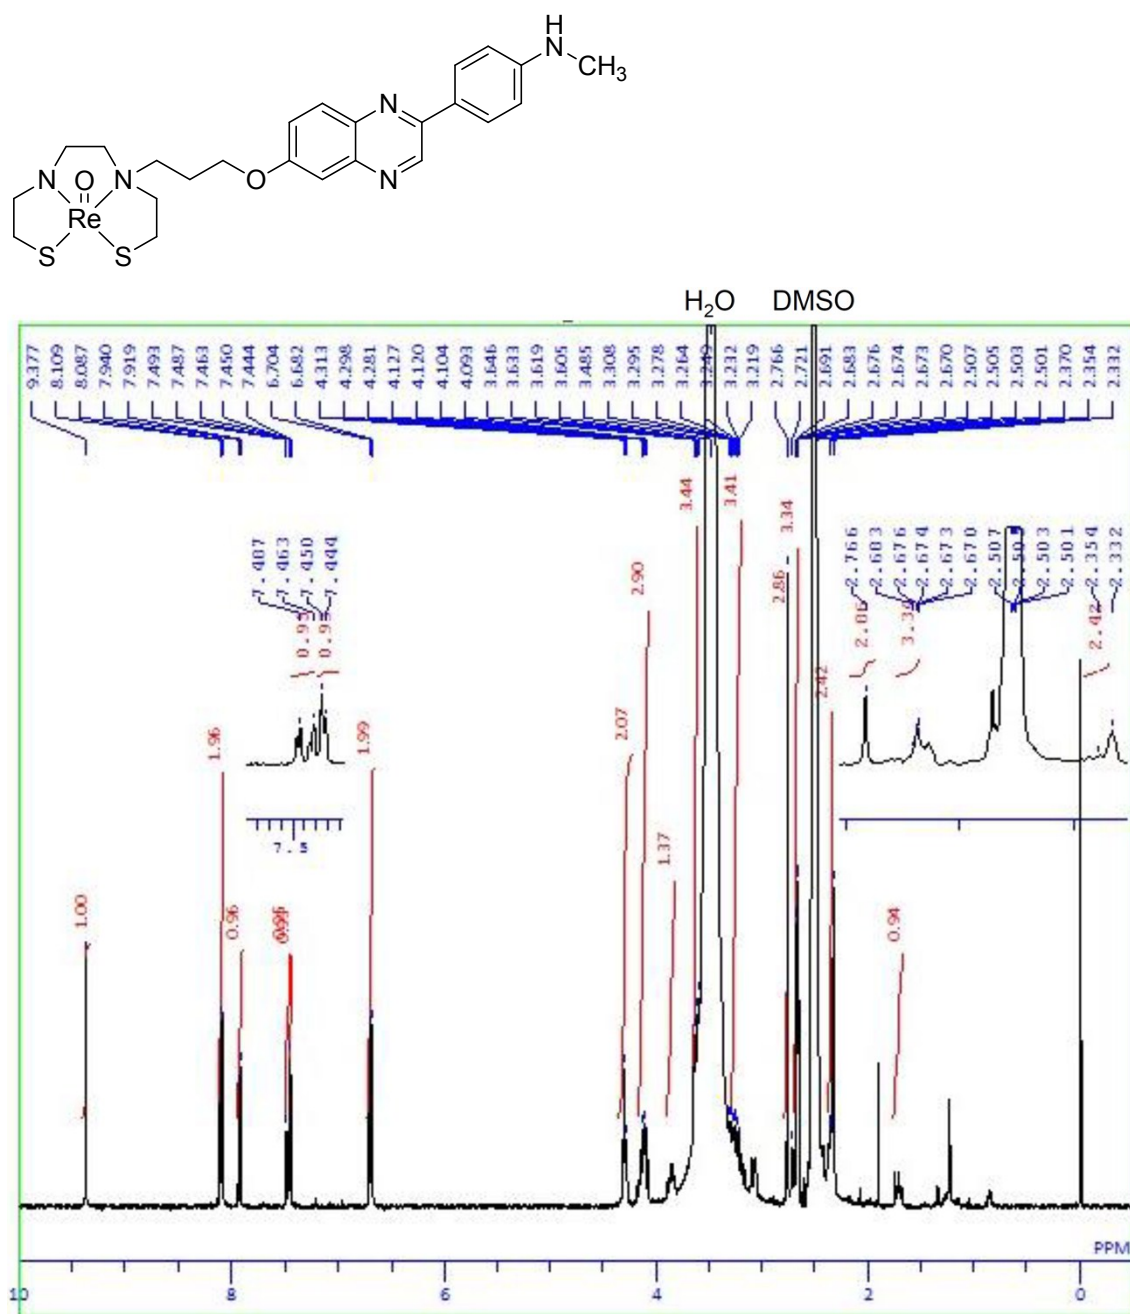

**Supplementary Figure S3.** Chemical structure and  $^1\text{H}$  NMR spectra for compound 10

(Re-BAT-C3-PQ-2).

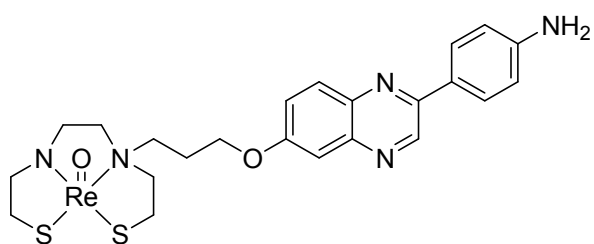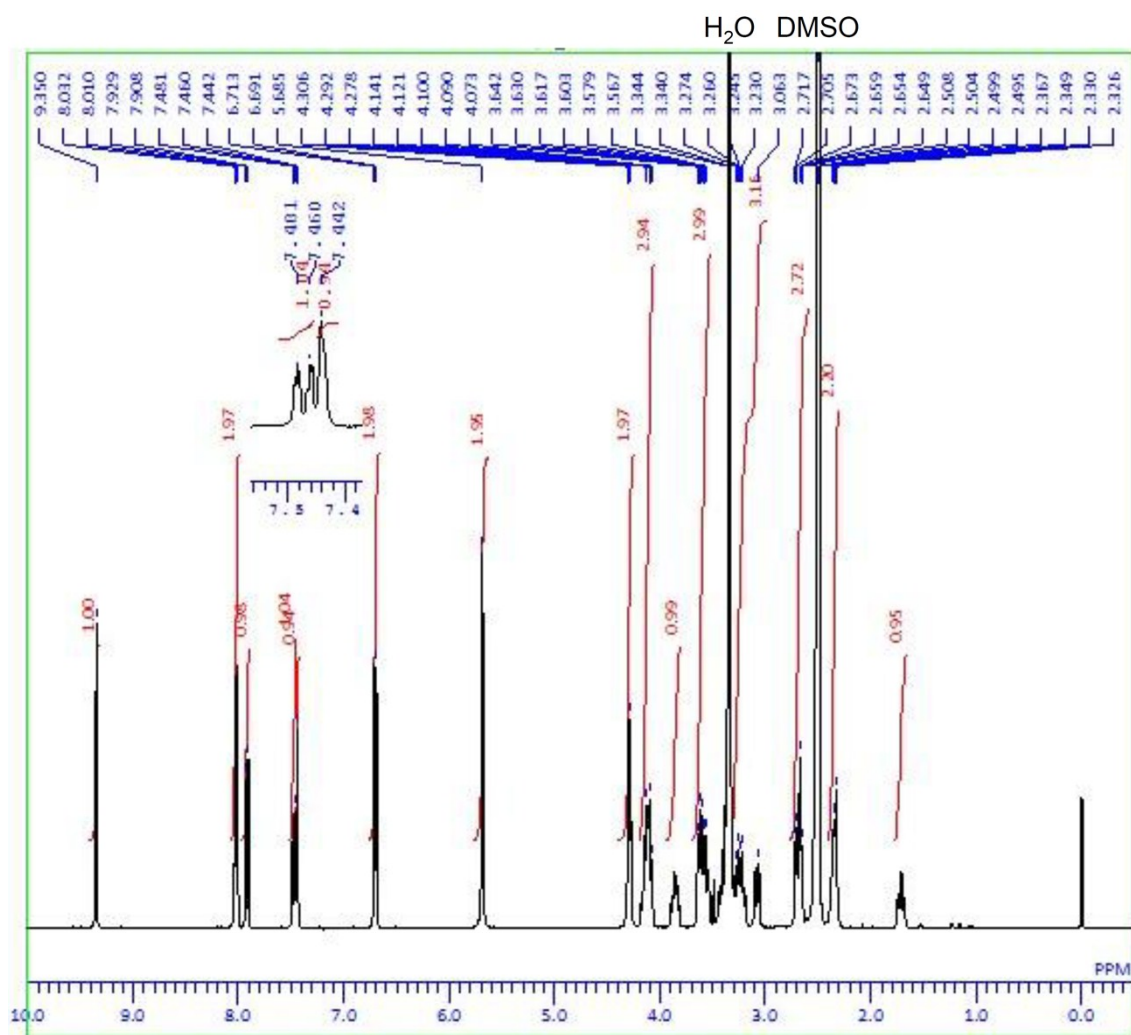

**Supplementary Figure S4.** Chemical structure and <sup>1</sup>H NMR spectra for compound 13

(Re-BAT-C3-PQ-3).
